# Supplementary material for: Dynamic regimes of the Greenland Ice Sheet emerging from interacting melt-elevation and glacial isostatic adjustment feedbacks
Source: Copernicus journal article supplement (doi:10.5194/esd-2021-100), 2021-12-17
Supplement: Supplementary file 1 [file esd-2021-100-supplement.pdf]

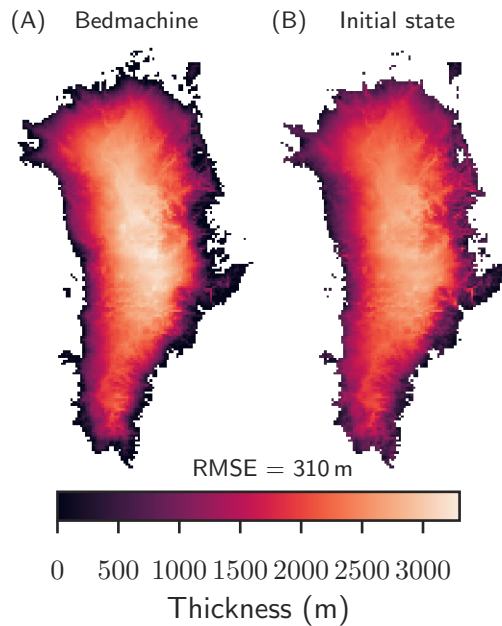

**Figure S1.** Comparison of the ice thickness of the initial state to BedMachine (Morlighem et al., 2017) (remapped to 15 km resolution to be comparable).

## References

- Joughin, I., Smith, B. E., and Howat, I.: Greenland Ice Mapping Project: Ice Flow Velocity Variation at sub-monthly to decadal time scales, *The Cryosphere Discussions*, pp. 1–30, <https://doi.org/10.5194/tc-12-2211-2018>, 2018.
- Morlighem, M., Williams, C. N., Rignot, E., An, L., Arndt, J. E., Bamber, J. L., Catania, G., Chauché, N., Dowdeswell, J. A., Dorschel, B., Fenty, I. G., Hogan, K., Howat, I., Hubbard, A., Jakobsson, M., Jordan, T. M., Kjeldsen, K. K., Millan, R., Mayer, L., Mouginot, J., Noël, B. P. Y., O’Cofaigh, C., Palmer, S., Rysgaard, S., Seroussi, H., Siegert, M. J., Slabon, P., Straneo, F., Van Den Broeke, M. R., Weinrebe, W., Wood, M., and Zinglensen, K. B.: BedMachine v3: Complete Bed Topography and Ocean Bathymetry Mapping of Greenland From Multibeam Echo Sounding Combined With Mass Conservation, *Geophysical Research Letters*, 44, 11,051–11,061, <https://doi.org/10.1002/2017GL074954>, 2017.
- 5 Noël, B. P. Y., van de Berg, W. J., Lhermitte, S., and van den Broeke, M. R.: Rapid ablation zone expansion amplifies north Greenland mass loss, *Science Advances*, 5, 2–11, <https://doi.org/10.1126/sciadv.aaw0123>, 2019.
- 10

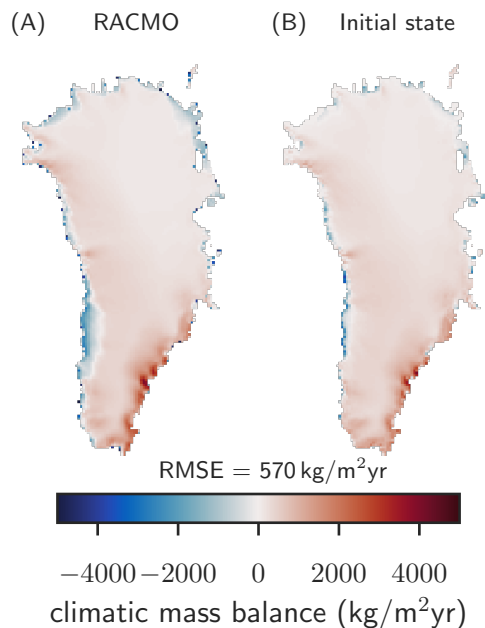

**Figure S2.** Comparison of the climatic mass balance of the initial state, computed with the positive degree day method and without temperature anomaly, to annually averaged RACMO v2.3 data averaged over 1958 to 1967 (Noël et al., 2019) (remapped to 15 km resolution to be comparable).

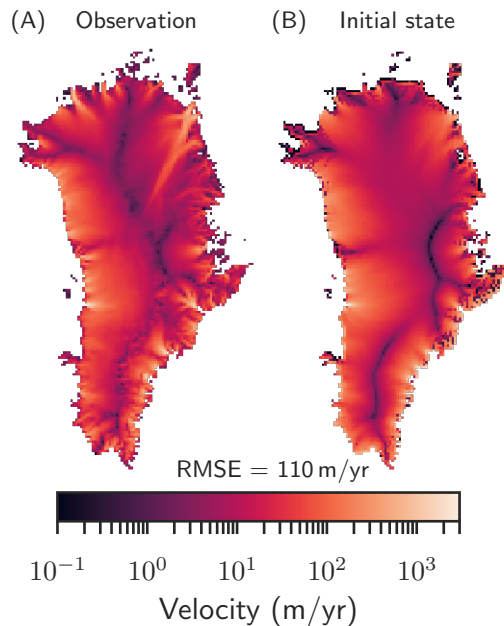

**Figure S3.** Comparison of the magnitude of the surface velocities of the initial state to observation data (Joughin et al., 2018) (remapped to 15 km resolution to be comparable).
